# Supplementary material for: Integrated DNA methylation analysis identifies topographical and tumoral biomarkers in pilocytic astrocytomas
Source: PubMed Central journal article supplement (PMC5862617; doi:10.18632/oncotarget.24480), 2018-02-12
Supplement: oncotarget-09-13807-s001.pdf [file oncotarget-09-13807-s001.pdf]

## **Integrated DNA methylation analysis identifies topographical and tumoral biomarkers in pilocytic astrocytomas**

### **SUPPLEMENTARY MATERIALS**

**Supplementary Table 1: CpG Islands, and related genes, altered in the 27 K and validated in 450 K.** See Supplementary\_Table\_1

**Supplementary Table 2: Average methylation value for each sample at CpG Islands, and related genes, altered in the 27 K and validated in 450 K.** See Supplementary\_Table\_2

**Supplementary Table 3: Sequences of primers used for qRT-PCR.** See Supplementary\_Table\_3
